# Supplementary material for: Prodigiosin-Producing Serratia marcescens as the Causal Agent of a Red Colour Defect in a Blue Cheese
Source: MDPI journal article supplement (doi:10.3390/foods12122388), 2023-06-16
Supplement: s1 [file s1]

**Table S1.-** General features of the whole genome sequence of *S. marcescens* RO1 isolated from a pink-coloured curd.

| General genome features                               | <i>S. marcescens</i> RO1                       |
|-------------------------------------------------------|------------------------------------------------|
| Genome size (bp)                                      | 5.345.289                                      |
| % G+C content                                         | 59.41                                          |
| No. of contigs                                        | 65                                             |
| No. of indicated protein-encoding genes               |                                                |
| Total                                                 | 5294                                           |
| With functional assignments                           | 4289                                           |
| Hypothetical                                          | 1005                                           |
| No. of indicated RNA genes                            |                                                |
| rRNA operons                                          | 4                                              |
| tRNA molecules                                        | 78                                             |
| Virulence Factors (VFDB)                              | 24                                             |
| Antibiotic Resistance genes                           | Flagellum, Lipopolysaccharide<br>5             |
| Genes encoding plasmid replication proteins           | <i>ampC, acc(6)-lc, macAB, tetA, fosA</i><br>0 |
| Genes coding for transposases/integrases/excisionases | 4/11/0                                         |
| Pathways of secondary metabolites                     | 8                                              |
